# Supplementary material for: Cannabinoids infused mouthwash products are as effective as chlorhexidine on inhibition of total-culturable bacterial content in dental plaque samples
Source: J Cannabis Res. 2020 Jun 23;2:20. doi: 10.1186/s42238-020-00027-z (PMC7819473; doi:10.1186/s42238-020-00027-z)
Supplement: Supplementary file 3 — Additional file 3. Data on average of zone of inhibition measurements for test and control mouthwash products. [file 42238_2020_27_MOESM3_ESM.xlsm]

## Sheet: Table S1
Sample Nr.	Gender	Age	DPSI score	Average Zone of inhibition (mm)
				Product A	Product B	Chlorhexidine 0.2%_Minimum	Chlorhexidine 0.2%_Maximum	CannIBite_CBD-MW_Minimum	CannIBite_CBD-MW_Maximum	CannIBite_CBG-MW_Minimum	CannIBite_CBG-MW_Maximum
Sample 1	M	30	2	0	0	18	-	18	-	15	20
Sample 2	M	57	3+	0	0	19	-	17	-	17	18
Sample 3	F	52	3-	0	0	18	19	20	25	18	20
Sample 4	F	49	2	0	0	16	-	20	22	15	18
Sample 5	F	52	2	0	0	16	-	16	-	17	-
Sample 6	M	83	3-	0	0	21	-	18	20	18	20
Sample 7	M	47	2	0	0	25	-	25	-	24	-
Sample 8	F	24	3-	0	0	19	-	18	-	16	17
Sample 9	F	42	2	0	0	18	-	16	-	17	-
Sample 10	M	66	2	0	0	15	-	17	-	14	-
Sample 11	M	48	3-	0	0	21	23	21	-	21	-
Sample 12	F	38	2	0	0	20	-	19	21	18	22
Sample 13	F	32	2	0	0	19	-	17	18	16	18
Sample 14	M	18	2	0	0	19	-	18	-	16	17
Sample 15	M	54	3+	0	0	18	-	16	17	16	17
Sample 16	F	19	2	0	0	17	-	16	-	16	-
Sample 17	F	51	2	0	0	17	-	17	-	17	-
Sample 18	M	52	2	0	0	19	20	18	-	18	19
Sample 19	M	32	2	0	0	18	-	17	-	17	-
Sample 20	M	30	2	0	0	18	-	18	-	18	-
Sample 21	F	25	2	0	0	18	-	16	17	16	17
Sample 22	M	34	2	0	0	19	20	18	19	17	18
Sample 23	F	41	2	0	0	19	-	19	-	19	-
Sample 24	M	38	2	0	0	17	18	18	20	18	20
Sample 25	F	19	2	0	0	17	18	16	17	17	-
Sample 26	M	29	2	0	0	19	20	18	21	18	20
Sample 27	F	39	2	0	0	18	-	16	18	16	18
Sample 28	M	51	3+	0	0	20	21	19	20	19	20
Sample 29	F	30	2	0	0	16	17	17	18	17	18
Sample 30	M	38	2	0	0	20	-	19	20	18	19
Sample 31	F	34	2	0	0	18	-	17	18	17	18
Sample 32	F	34	2	0	0	15	-	18	-	17	-
Sample 33	M	25	2	0	0	16	18	24	-	22	-
Sample 34	F	29	2	7	0	12	-	8	-	8	-
Sample 35	F	34	2	0	0	17	-	22	-	21	-
Sample 36	M	33	2	0	0	15	-	17	-	17	-
Sample 37	M	40	2	0	0	20	21	23	24	25	-
Sample 38	F	44	2	0	0	13	14	15	17	14	16
Sample 39	F	30	2	0	0	16	-	20	-	20	-
Sample 40	F	49	2	0	0	17	-	19	20	17	19
Sample 41	M	36	2	0	0	14	-	17	18	18	-
Sample 42	M	52	3+	0	0	12	-	17	-	15	-
Sample 43	F	24	2	0	0	14	-	20	-	18	-
Sample 44	M	36	2	0	0	15	-	16	17	18	20
Sample 45	F	48	3-	0	0	13	-	18	20	17	18
Sample 46	F	29	2	0	0	15	-	15	17	14	16
Sample 47	F	30	2	0	0	16	-	17	19	17	19
Sample 48	F	25	2	0	0	14	-	15	-	14	-
Sample 49	M	43	3-	0	0	15	-	17	-	17	-
Sample 50	F	35	2	0	0	19	-	23	-	20	-
Sample 51	M	31	2	0	0	15	-	14	-	14	-
Sample 52	M	28	2	0	0	16	-	20	-	18	-
Sample 53	M	56	3+	0	0	14	-	16	-	16	-
Sample 54	F	63	3-	0	0	16	-	16	-	15	-
Sample 55	F	32	3-	0	0	15	-	14	-	14	-
Sample 56	F	22	2	0	0	18	-	18	-	18	-
Sample 57	M	44	3-	8	0	18	-	18	-	18	-
Sample 58	M	32	2	8	0	12	-	13	-	13	-
Sample 59	M	60	3+	8	0	14	-	13	-	13	-
Sample 60	F	36	3-	8	0	15	-	14	16	14	16
Sample 61	F	56	3-	0	0	16	-	12	15	12	-
Sample 62	M	50	3+	0	0	17	-	16	-	16	-
Sample 63	F	56	3+	0	0	15	-	19	-	19	-
Sample 64	M	62	3+	8	0	15	-	18	23	18	23
Sample 65	F	61	3-	8	0	15	-	17	21	17	21
Sample 66	M	33	2	0	0	16	-	20	-	20	-
Sample 67	M	32	2	0	0	14	-	17	21	16	20
Sample 68	F	50	2	8	0	15	-	18	21	17	20
Sample 69	F	21	2	0	0	15	-	15	-	15	-
Sample 70	F	23	2	8	0	14	16	14	17	14	17
Sample 71	F	63	3+	0	0	16	-	15	-	15	-
Sample 72	M	45	2	0	0	13	-	8	-	8	9
Size of paper disc: 6mm
